# Supplementary material for: Application of the Circular Equation Motion in the Investigation of the Dynamic Behavior of the Tunneling Particles via the Periodic Potential Barrier
Source: MDPI journal article supplement (doi:10.3390/nu14173606), 2014-01-01
Supplement: s1 [file s1]

## **Supplementary material**

Reduction of cardiovascular events and related healthcare expenditures through achieving population-level targets of dietary salt intake in Japan: A simulation model based on the National Health and Nutrition Survey.

Nayu Ikeda, Hitomi Yamashita, Jun Hattori, Hiroki Kato, Katsushi Yoshita, Nobuo Nishi.

Correspondence: Nayu Ikeda, PhD  
ikedan@nibiohn.go.jp  
Section of Population Health Metrics  
International Center for Nutrition and Information  
National Institute of Health and Nutrition  
National Institutes of Biomedical Innovation, Health and Nutrition  
Tokyo, Japan

**Table S1.** Baseline data on total population, mean dietary salt intake, and mean systolic blood pressure by age group and sex in Japan, 2019

| <b>Sex, age<br/>(years)</b> | <b>Total population,<br/>thousand [1]</b> | <b>Mean dietary salt<br/>intake, g/day [2]</b> | <b>Mean systolic blood<br/>pressure, mmHg [2]</b> |
|-----------------------------|-------------------------------------------|------------------------------------------------|---------------------------------------------------|
| Men                         |                                           |                                                |                                                   |
| 40–49                       | 9,373                                     | 10.60                                          | 125.8                                             |
| 50–59                       | 8,160                                     | 10.62                                          | 131.7                                             |
| 60–69                       | 7,930                                     | 11.48                                          | 135.8                                             |
| 70–79                       | 7,332                                     | 11.52                                          | 135.8                                             |
| Women                       |                                           |                                                |                                                   |
| 40–49                       | 9,147                                     | 8.89                                           | 114.3                                             |
| 50–59                       | 8,118                                     | 9.15                                           | 123.7                                             |
| 60–69                       | 8,302                                     | 9.99                                           | 131.0                                             |
| 70–79                       | 8,593                                     | 9.77                                           | 136.1                                             |

**Table S2.** Baseline data on the incidence, prevalence, and mortality of ischemic heart disease and stroke by age group and sex in Japan, 2019, based on estimates from the Global Burden of Disease Study [3]

| Sex, age (years) | Incidence, per 100,000   |                      | Prevalence, per 100,000      |                            | Mortality, per 100,000 |                      |                            |
|------------------|--------------------------|----------------------|------------------------------|----------------------------|------------------------|----------------------|----------------------------|
|                  | Ischemic heart disease   | Stroke               | Ischemic heart disease       | Stroke                     | Ischemic heart disease | Stroke               | All causes                 |
| Men              |                          |                      |                              |                            |                        |                      |                            |
| 40–49            | 134.7 (96.2, 180.3)      | 201.9 (161.5, 250.0) | 862.1 (732.8, 1,017.7)       | 1,363.8 (1,139.2, 1,609.8) | 16.6 (15.9, 17.2)      | 15.1 (14.2, 15.9)    | 150.6 (147.9, 153.4)       |
| 50–59            | 346.5 (247.5, 458.7)     | 363.0 (294.5, 439.8) | 2,552.7 (2,191.9, 2,961.1)   | 3,055.7 (2,590.4, 3,593.4) | 44.2 (42.6, 46.0)      | 35.2 (33.4, 37.1)    | 390.6 (383.1, 398.5)       |
| 60–69            | 609.3 (441.1, 791.2)     | 486.3 (386.7, 597.2) | 6,008.3 (5,134.4, 7,022.8)   | 4,789.8 (4,152.9, 5,523.5) | 98.9 (94.8, 102.8)     | 75.1 (71.2, 78.9)    | 996.9 (979.4, 1,015.4)     |
| 70–79            | 1,065.4 (781.2, 1,426.5) | 607.9 (481.2, 758.3) | 10,933.6 (9,402.7, 12,584.7) | 7,190.4 (6,109.9, 8,328.9) | 240.1 (221.8, 252.3)   | 212.0 (194.8, 224.9) | 2,579.2 (2,538.1, 2,622.3) |
| Women            |                          |                      |                              |                            |                        |                      |                            |
| 40–49            | 27.8 (17.6, 41.4)        | 175.9 (136.7, 220.1) | 478.4 (408.0, 568.0)         | 1,319.8 (1,112.4, 1,559.3) | 3.5 (3.3, 3.7)         | 6.9 (6.4, 7.4)       | 88.2 (86.6, 90.0)          |
| 50–59            | 82.4 (56.0, 114.2)       | 353.1 (279.6, 438.4) | 971.4 (834.9, 1,136.1)       | 3,141.2 (2,607.7, 3,734.0) | 9.0 (8.4, 9.5)         | 14.8 (13.8, 15.7)    | 201.1 (197.4, 205.1)       |
| 60–69            | 227.4 (162.6, 301.2)     | 555.8 (437.3, 687.1) | 2,300.7 (1,968.9, 2,715.7)   | 5,270.6 (4,476.6, 6,225.4) | 27.1 (25.0, 28.7)      | 29.5 (27.2, 31.4)    | 439.3 (432.3, 446.8)       |
| 70–79            | 607.4 (445.4, 809.0)     | 745.6 (593.7, 913.8) | 5,229.1 (4,436.4, 6,051.9)   | 7,320.6 (6,322.7, 8,492.5) | 102.7 (85.8, 112.6)    | 98.6 (83.4, 107.8)   | 1,205.0 (1,187.4, 1,223.8) |

Original estimates by 5-year age groups and sex in the Global Burden of Disease Study were averaged between two adjacent age groups to obtain estimates by 10-year age group and sex. Values in parentheses indicate lower and upper bounds of 95% confidence intervals.

**Table S3.** Baseline data on proportions of first-ever incident cases and acute case fatality of ischemic heart disease and stroke, by sex

| Sex   | Proportion of first-ever cases in incidence, % |            | 28-day case fatality, % [4] |        |
|-------|------------------------------------------------|------------|-----------------------------|--------|
|       | Ischemic heart disease [5]                     | Stroke [6] | Ischemic heart disease      | Stroke |
| Men   | 92.4                                           | 71.8       | 34.3                        | 14.9   |
| Women | 92.4                                           | 75.2       | 43.3                        | 15.7   |

**Table S4.** Baseline data on epidemiologic associations used in the model, by age group, both sexes

| Age (years) | Change in systolic blood pressure per 100 mmol/24-hour change in sodium intake [7]* | Relative risk per 10 mmHg increase of systolic blood pressure [3]† |                      |
|-------------|-------------------------------------------------------------------------------------|--------------------------------------------------------------------|----------------------|
|             |                                                                                     | Ischemic heart disease                                             | Stroke‡              |
| 40–49       | 6.6 (4.6, 8.6)                                                                      | 1.568 (1.398, 1.799)                                               | 1.628 (1.354, 1.950) |
| 50–59       | 9.2 (6.8, 11.6)                                                                     | 1.487 (1.385, 1.619)                                               | 1.521 (1.361, 1.698) |
| 60–69       | 10.3 (7.8, 12.8)                                                                    | 1.405 (1.332, 1.488)                                               | 1.414 (1.302, 1.524) |
| 70–79       | 10.3 (7.8, 12.8)                                                                    | 1.303 (1.225, 1.404)                                               | 1.284 (1.179, 1.389) |

Values in parentheses indicate lower and upper bounds of 95% confidence intervals.

\* Confidence intervals were calculated from point estimates and standard errors by authors. The value in the 60–69-year-old group were assigned to the 70–79-year-old group.

† Estimates in 5-year age groups of 40–44, 50–54, 60–64, and 70–74 years in the original data source were assigned to 40–49, 50–59, 60–69, and 70–79-year-old groups, respectively, in the simulation.

‡ Relative risks for stroke per 10 mmHg increase of systolic blood pressure were separated for ischemic and hemorrhagic strokes in the original data source. Relative risks for ischemic stroke were adopted to represent total stroke in the simulation, because mortality of ischemic stroke was higher than that of hemorrhagic stroke in Japan in 2019 [3].

**Table S5.** Baseline data on national healthcare expenditures for ischemic heart disease and stroke by age group and sex in Japan, 2019, in US dollars

| Sex, age (years) | Outpatient [8]         |                   | Prescription drug [9] * |             | Inpatient [8]          |                       |
|------------------|------------------------|-------------------|-------------------------|-------------|------------------------|-----------------------|
|                  | Ischemic heart disease | Stroke            | Ischemic heart disease  | Stroke      | Ischemic heart disease | Stroke                |
| Men              |                        |                   |                         |             |                        |                       |
| 40–49            | 35,364,424 (152)       | 39,405,039 (158)  | 85,358,054              | 134,808,300 | 141,704,629 (7,533)    | 281,339,719 (7,800)   |
| 50–59            | 87,831,966 (152)       | 86,157,495 (148)  | 212,023,436             | 255,306,366 | 356,931,703 (7,600)    | 565,244,331 (7,328)   |
| 60–69            | 208,939,636 (156)      | 203,605,009 (143) | 497,141,993             | 393,793,874 | 741,825,638 (7,523)    | 1,148,701,123 (6,846) |
| 70–79            | 385,546,673 (165)      | 406,479,963 (147) | 814,926,360             | 537,887,522 | 1,136,662,606 (7,336)  | 2,064,660,178 (6,539) |
| Women            |                        |                   |                         |             |                        |                       |
| 40–49            | 13,382,250 (141)       | 30,252,600 (163)  | 45,807,785              | 127,071,537 | 17,495,525 (5,973)     | 187,198,524 (8,677)   |
| 50–59            | 30,183,302 (142)       | 58,230,654 (145)  | 80,541,519              | 260,671,232 | 48,319,855 (5,911)     | 339,630,624 (8,055)   |
| 60–69            | 75,611,508 (141)       | 129,819,141 (137) | 199,894,276             | 452,168,988 | 158,329,288 (6,496)    | 665,357,310 (7,507)   |
| 70–79            | 185,520,103 (142)      | 309,967,874 (137) | 453,522,455             | 639,243,249 | 405,050,809 (6,552)    | 1,576,486,179 (6,876) |

National healthcare expenditures on outpatient care were defined as the sum of expenditures on outpatient care and prescription drugs. Values in parentheses indicate healthcare expenditures per case calculated by authors.

\* Data were available only for total cardiovascular diseases in the total population (approximately 7.9 billion US dollars) in the original data source. To obtain data on pharmaceutical drug costs for ischemic heart disease and stroke by age group and sex, the total cardiovascular drug cost was multiplied by proportions of people having a disease in each age group and sex in the total of people having these two diseases obtained from the Global Burden of Disease Study [3]. Pharmaceutical drug costs per case were therefore constant at approximately 1,072 US dollars for ischemic heart disease and stroke across sex-age groups.

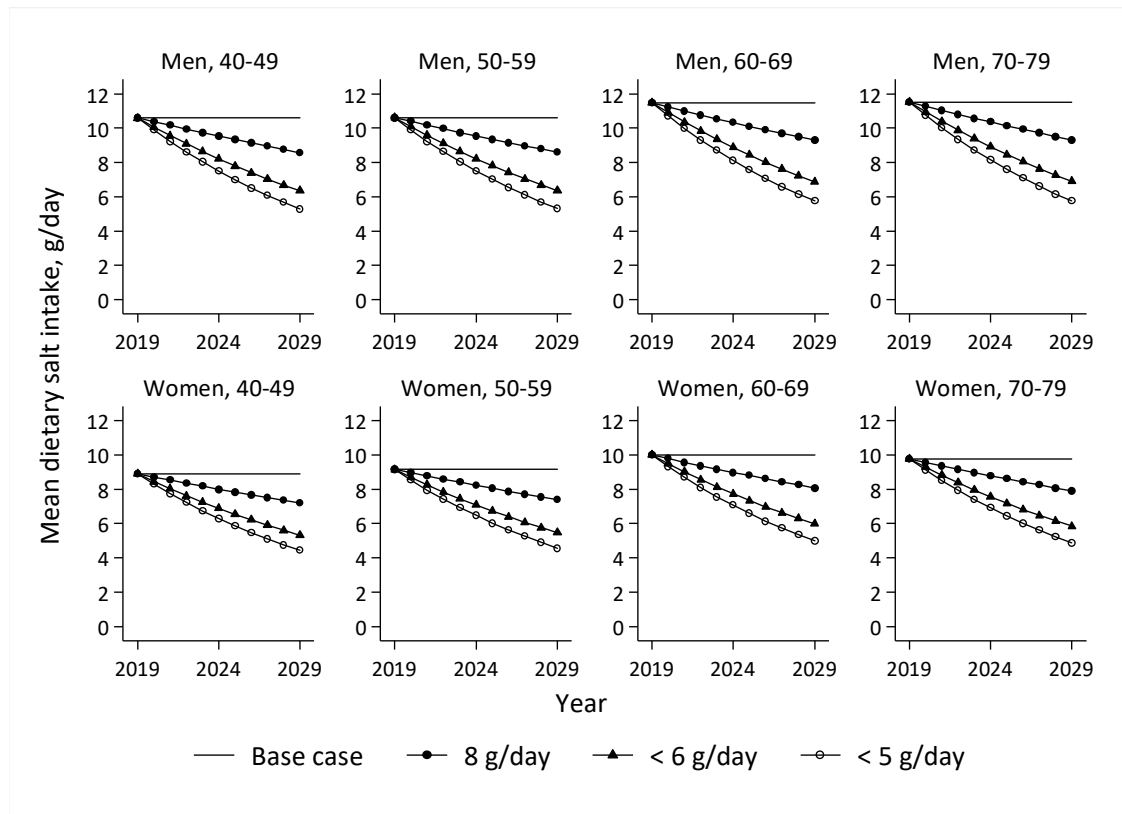

**Figure S1.** Mean dietary salt intake to be achieved to reach dietary salt reduction targets between the years 2019 and 2029, by age group and sex. Base case refers to sustaining the baseline levels of 2019; 8 g/day, to meet the Japanese national health promotion goal; < 6 g/day, per the Japanese Hypertension Society’s Guidelines for the Management of Hypertension; and < 5 g/day, as specified by the World Health Organization.

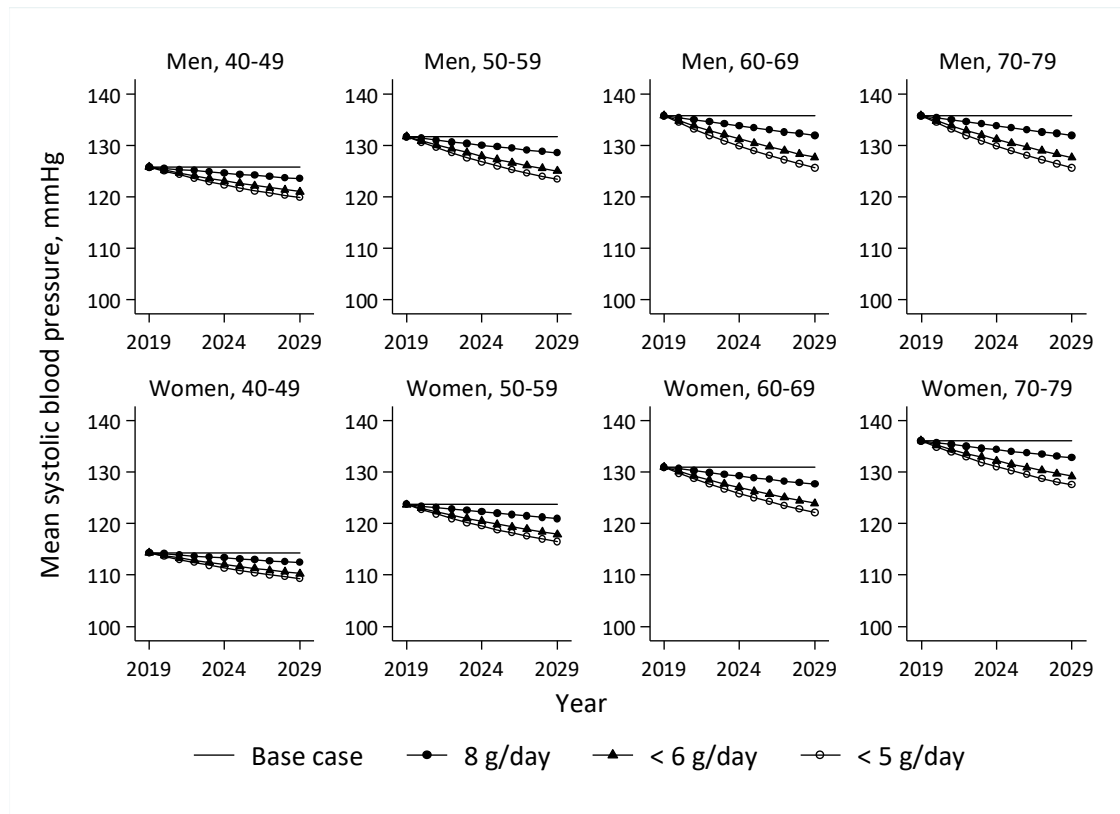

**Figure S2.** Mean systolic blood pressure to be achieved to reach dietary salt reduction targets between the years 2019 and 2029, by age group and sex. Base case refers to sustaining the baseline levels of 2019; 8 g/day, to meet the Japanese national health promotion goal; < 6 g/day, per the Japanese Hypertension Society’s Guidelines for the Management of Hypertension; and < 5 g/day, as specified by the World Health Organization.

## References

1. Statistics Bureau of Japan, Ministry of Internal Affairs and Communications. Current Population Estimates as of October 1, 2019. Available online: <https://www.stat.go.jp/english/data/jinsui/2019np/index.html> (accessed on 4 February 2022).
2. Ministry of Health, Labour and Welfare. *The National Health and Nutrition Survey in Japan, 2019*; Ministry of Health, Labour and Welfare: Tokyo, 2020.
3. Global Burden of Disease Collaborative Network. Global Burden of Disease Study 2019 (GBD 2019) Results. Available online: <https://vizhub.healthdata.org/gbd-results/> (accessed on 25 July 2022).
4. Rumana, N.; Kita, Y.; Turin, T.C.; Nakamura, Y.; Takashima, N.; Ichikawa, M.; Sugihara, H.; Morita, Y.; Hirose, K.; Kawakami, K., et al. Acute case-fatality rates of stroke and acute myocardial infarction in a Japanese population: Takashima stroke and AMI registry, 1989-2005. *Int J Stroke* **2014**, *9 Suppl A100*, 69-75, doi:10.1111/ij.s.12288.
5. Uchiyama, S.; Shibata, Y.; Hirabayashi, T.; Mihara, B.; Hamashige, N.; Kitagawa, K.; Goto, S.; Origasa, H.; Shimada, K.; Kobayashi, H., et al. Risk factor profiles of stroke, myocardial infarction, and atrial fibrillation: a Japanese Multicenter Cooperative Registry. *J Stroke Cerebrovasc Dis* **2010**, *19*, 190-197, doi:10.1016/j.jstrokecerebrovasdis.2009.04.004.
6. Takashima, N.; Arima, H.; Kita, Y.; Fujii, T.; Miyamatsu, N.; Komori, M.; Sugimoto, Y.; Nagata, S.; Miura, K.; Nozaki, K. Incidence, Management and Short-Term Outcome of Stroke in a General Population of 1.4 Million Japanese — Shiga Stroke Registry —. *Circulation Journal* **2017**, *81*, 1636-1646, doi:10.1253/circj.CJ-17-0177.
7. Law, M.R.; Frost, C.D.; Wald, N.J. By how much does dietary salt reduction lower blood pressure? I--Analysis of observational data among populations. *BMJ* **1991**, *302*, 811-815, doi:10.1136/bmj.302.6780.811.
8. Ministry of Health, Labour and Welfare. Overview of national medical care expenditure, 2019. Available online: <https://www.mhlw.go.jp/toukei/saikin/hw/k-iryohi/19/index.html> (accessed on 13 April 2022).
9. Ministry of Health, Labour and Welfare. Survey on Prescription Drug Expenditure, 2019. Available online: [https://www.mhlw.go.jp/bunya/iryohoken/database/zenpan/cyouzai\\_doukou.html](https://www.mhlw.go.jp/bunya/iryohoken/database/zenpan/cyouzai_doukou.html) (accessed on 10 February 2022).
